# Supplementary material
Source: PubMed Central journal article supplement (PMC3989619)
Supplement: embj0033-0265-sd1.pdf [file embj0033-0265-sd1.pdf]

## Supplementary information for:

### **Dom34-Hbs1 mediated dissociation of inactive 80S ribosomes promotes restart of translation after stress.**

Antonia M.G. van den Elzen<sup>1</sup>, Anthony Schuller<sup>2</sup>, Rachel Green<sup>2</sup>, and Bertrand Séraphin<sup>1,\*</sup>

<sup>1</sup> Equipe Labellisée La Ligue, Institut de Génétique et de Biologie Moléculaire et Cellulaire (IGBMC), Centre National de Recherche Scientifique (CNRS) UMR 7104/Institut National de Santé et de Recherche Médicale (INSERM) U964/Université de Strasbourg, 67404 Illkirch, France

<sup>2</sup> Howard Hughes Medical Institute, Department of Molecular Biology and Genetics, Johns Hopkins University School of Medicine, Baltimore, Maryland, USA.

\* Corresponding author: Bertrand Séraphin ([seraphin@igbmc.fr](mailto:seraphin@igbmc.fr))

Running title: Dom34-Hbs1 modulates ribosomal subunit availability after stress

#### **Supplementary Material and Methods**

##### *In vitro translation*

Translational extracts (Tuite & Plesset, 1986) were prepared from a *dom34Δhbs1Δ* strain (BSY2550) as follows. 4 L of culture at OD<sub>600</sub> = 1 was washed in 200 ml cold water, incubated in 100 ml β-mercaptoethanol 10mM; EDTA 2 mM for 30 minutes at room temperature, washed in 100 ml cold sorbitol 1M and resuspended in 1M sorbitol at room temperature at a concentration of 10 ml/g cells, spinning at 2000 x g for 5 min at 4°C in between. Zymolyase was added at 4 μg/ml final concentration and the reaction was stopped by pelleting the resulting spheroplast at 1000 x g for 10 min at room temperature when 75% of cells had converted to spheroplasts. Spheroplasts were washed in 200 ml sorbitol 1.2 M and incubated in 500 ml YPDA-sorbitol 1M at 25°C 40 rpm. Spheroplasts were harvested at 1000 x g for 10 min at 4°C and lysed using glass beads (0.5 ml/g cells) in lysis buffer (20 mM Hepes-KOH pH7.4; 100 mM KOAc; 2 mM Mg(OAc)<sub>2</sub>; 2 mM DTT; 0.5 mM PMSF; protease

inhibitor cocktail) (1 ml/g cells) in 5 cycles of shaking vigorously at 2 Hz for 20 seconds with 1 minute intervals on ice. Lysates were cleared spinning 30 000 x g for 15 min at 4°C, then 100 000 x g for 30 min at 4°C. Glycerol was added at 10% final concentration for storage at -80°C.

In vitro translation was performed basically as described in (Tarun & Sachs, 1995). Translational extracts were incubated with 150 U/ml micrococcal nuclease (New England Biolabs) in presence of 480 µM CaCl<sub>2</sub> for 5 minutes at 26°C, before adding 2 mM EGTA on ice. 7.5 µl extract was added to 7.5 µl translation mix containing 0,1 µl RNasin (Promega), 500 ng firefly luciferase-A(50) mRNA (Gallie et al, 1991) and 4 µg creatine phosphokinase (Roche) in 22 mM Hepes-KOH pH 7.4; 120 mM KOAc; 2 mM MgOAc; 750 µM ATP; 100 µM GTP; 25 mM creatine phosphate; 40 µM amino acid mixture (Promega); 1.7 mM DTT. After 1 h incubation at 26°C luciferase activity was measured in 10 s measurements using a Lumat LB 9507 luminometer (Berthold technologies) adding 1 µl translation reaction to 50 µl luciferine mix (470 µM luciferine; 530 µM ATP; 270 µM coenzyme A; 20 mM Tris-phosphate pH 7.8; 1.07 mM MgCl<sub>2</sub>; 2.7 mM MgSO<sub>4</sub>; 100 µM EDTA; 33.3 mM DTT).

Dom34 added to the translation reaction was purified as described in (Shoemaker et al, 2010; Shoemaker & Green, 2011). Hbs1 was purified from BL21 codon+ cells expressing C-terminally 6xHis-tagged Hbs1 grown in Autoinduction media Terrific Broth Base including Trace elements (Formedium) over Ni-NTA agarose (Qiagen) after cell lysis in a Cell Disruptor (Constant Systems) at 1.55 kbar, using lysis buffer (75 mM Hepes pH 7.9, 300 mM NaCl, 5 mM β-mercaptoethanol, 1% Tween, 20 mM imidazole, 10% glycerol, 2 mM MgCl<sub>2</sub>), wash buffer (50 mM Hepes pH 7.9, 500 mM NaCl, 5 mM β-mercaptoethanol, 20 mM imidazole, 10% glycerol, 2 mM MgCl<sub>2</sub>) and elution buffer (50 mM Hepes pH 7.9, 500 mM NaCl, 5 mM β-mercaptoethanol, 300 mM imidazole, 10% glycerol, 2 mM MgCl<sub>2</sub>). Both Hbs1 and the Dom34-Hbs1 complex were further purified over a Superdex 75 10/300 GL column (GE Healthcare) in 20mM Tris-Cl pH 7.5, 200mM NaCl, 5mM β-mercaptoethanol, 5% glycerol.

#### *Yeast growth curves*

Yeast was grown to OD<sub>600</sub> 0.6 in YPDA, shifted to the indicated temperature and grown for another 2 hours. The rest of the experiment was done at the indicated temperatures. Cultures were split into 2 x 10 ml and resuspended in 10 ml YPA or YPDA for 10 minutes. Then 3 ml of each cultures was pelleted and resuspended in 15 ml YPDA (to an OD<sub>600</sub> of ~0.2). OD<sub>600</sub>

was measured at the indicated time points. OD<sub>600</sub> series corresponding to the same cultures were normalized for the OD<sub>600</sub> at time = 0 minutes to be 0.2.

### Supplementary table 1: Strains and plasmids

| Strain or plasmid name | Description<br>(genotype for strains; vector/insert/marker for plasmids)                  | Reference                          |
|------------------------|-------------------------------------------------------------------------------------------|------------------------------------|
| BMA64                  | <i>MAT a, ura31, trp1Δ, ade21, leu23,112, his311,15</i>                                   | (Baudin-Baillieu et al, 1997)      |
| BSY1970                | <i>MAT a, ura31, trp1Δ, ade21, leu23,112, his311,15, dom34Δ::HIS3</i>                     | (van den Elzen et al, 2010)        |
| BSY2145                | <i>MAT a, ura31, trp1Δ, ade 21, leu23,112, his311,15, hbs1Δ::KanR</i>                     | (van den Elzen et al, 2010)        |
| BSY2550                | <i>MAT a, ade 2-1 his3-11,15, leu2-3,112, trp1delta ura3-1, dom34Δ::HIS3, hbs1Δ::KanR</i> | This study                         |
| N20T20                 | <i>MAT a, ura3-1, trp1Δ, ade2-1, leu2-3,112, his3-11,15, stm1Δ::TRP1</i>                  | Gift from F. Lacroute and F. Wyers |
| BSY2626                | <i>MAT a, ura3-1, trp1Δ, ade2-1, leu2-3,112, his3-11,15, stm1Δ::TRP1, dom34Δ::HIS3</i>    | This study                         |
| pBS3614                | pRS415/ <i>HBS1-PROTEIN A</i> + promoter/ <i>LEU2</i>                                     | (van den Elzen et al, 2010)        |
| pBS3675                | pRS415/ <i>hbs1 V176G-PROTEIN A</i> + promoter/ <i>LEU2</i>                               | (van den Elzen et al, 2010)        |
| pBS3685                | pRS415/ <i>DOM34-3HA</i> + promoter/ <i>LEU2</i>                                          | (van den Elzen et al, 2010)        |
| pBS3701                | pRS415/ <i>dom34 E361R-3HA</i> + promoter/ <i>LEU2</i>                                    | (van den Elzen et al, 2010)        |
| pBS4415                | pRS415/ <i>hbs1ΔN-ter (2-149)-PROTEIN A</i> + promoter/ <i>LEU2</i>                       | This study                         |
