# Supplementary material
Source: PubMed Central journal article supplement (PMC3989619)
Supplement: embj0033-0265-sd2.pdf [file embj0033-0265-sd2.pdf]

## Supplementary figures

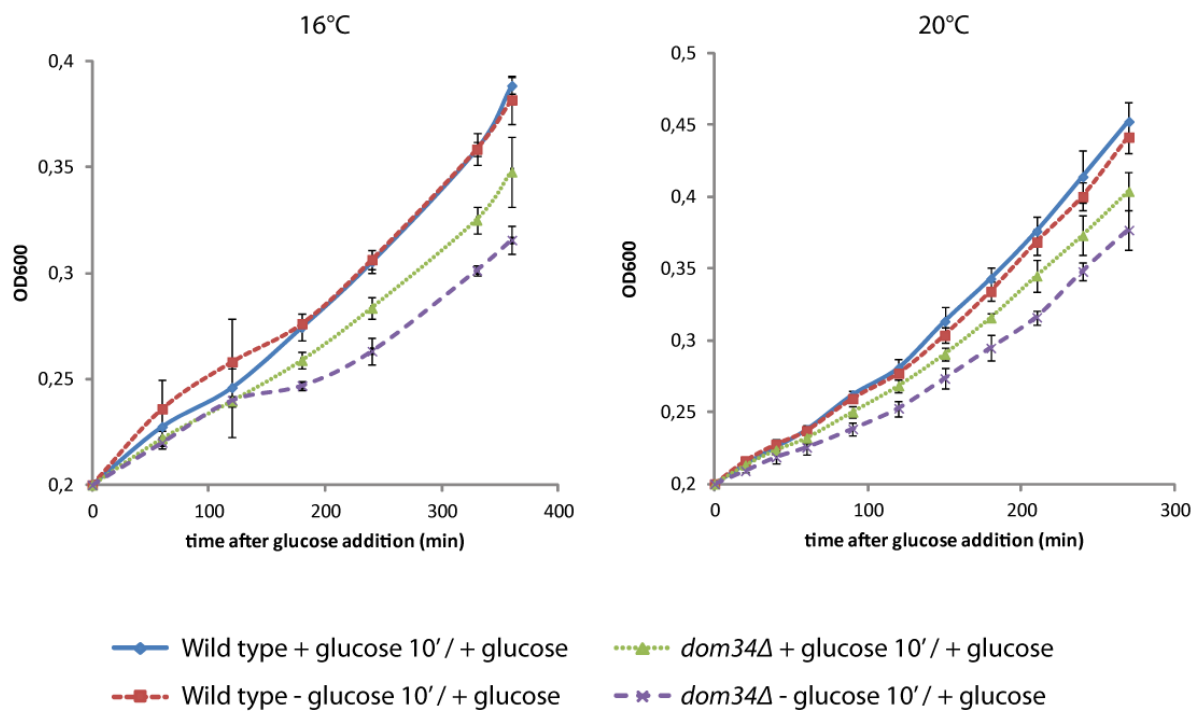

### Supplementary Figure 1. Recovery of growth after glucose starvation in wild type and *dom34Δ* yeast.

The OD<sub>600</sub> of wild type or *dom34Δ* yeast, depleted of glucose or grown in glucose rich medium for 10 minutes, was followed after resuspension in glucose rich medium. Experiments were performed at the indicated temperatures. Means  $\pm$  standard deviations of 3 independent experiments are displayed. The OD<sub>600</sub> (which was approximately 0.2 at time = 0 minutes) was normalized to be 0.2 at time = 0 minutes.
