# Supplementary material
Source: PubMed Central journal article supplement (PMC3989619)
Supplement: embj0033-0265-sd3.pdf [file embj0033-0265-sd3.pdf]

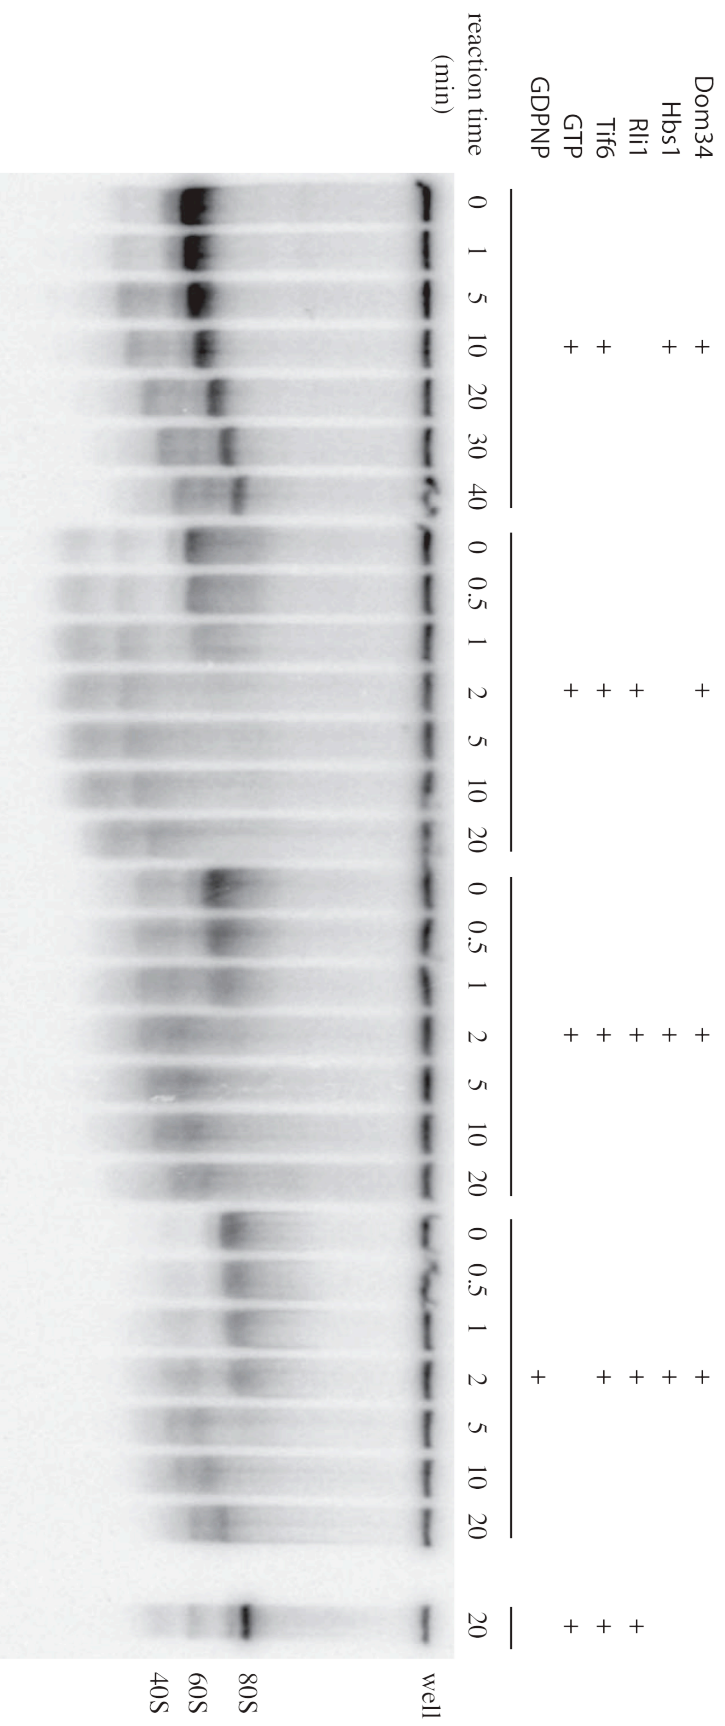

**Supplementary Figure 2. Kinetic analysis of Dom34, Hbs1 and Rli1 mediated dissociation of inactive ribosomes from glucose starved yeast.**

Dom34-Hbs1 and Rli1 dissociate ribosomes from glucose-starved yeast *in vitro*. <sup>32</sup>P-labeled 80S ribosomes purified from glucose-starved yeast were incubated with the indicated proteins in presence of ATP and GTP or GDPNP. At the indicated time points fractions of the reactions were analyzed on a 3% native acrylamide gel {Shoemaker, 2010 #22}. This figure shows one of the gels from which the rate constants in Figure 2B were determined.
