# Supplementary material
Source: PubMed Central journal article supplement (PMC3989619)
Supplement: embj0033-0265-sd4.pdf [file embj0033-0265-sd4.pdf]

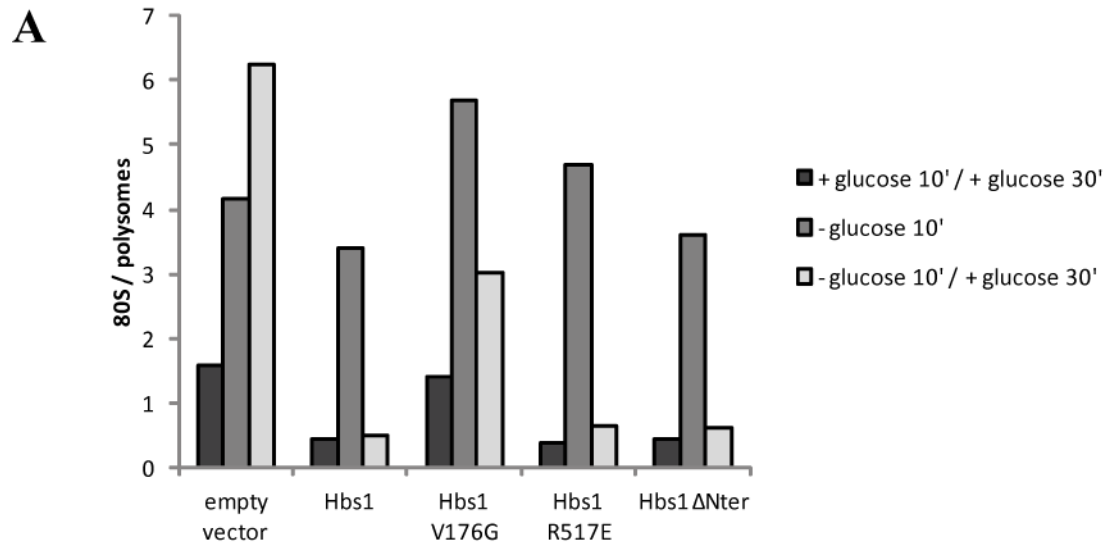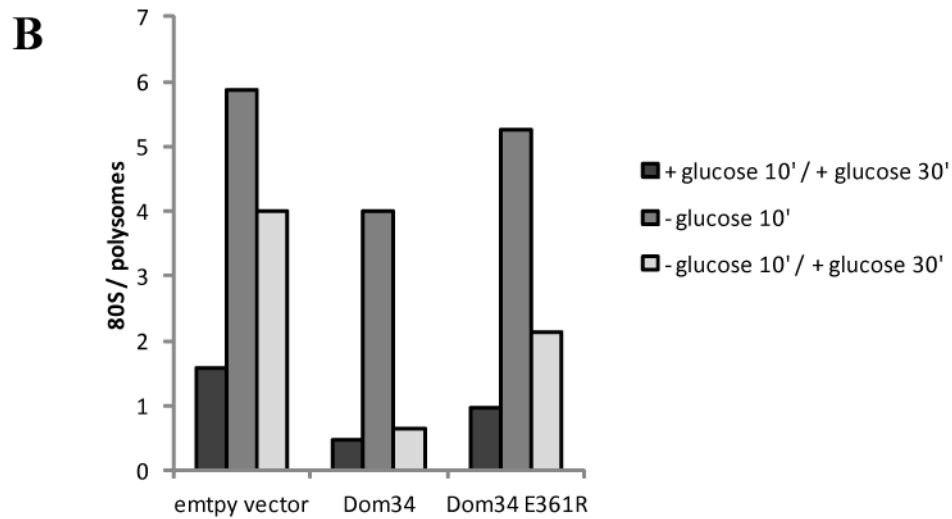

**Supplementary Figure 3. Restart of translation after glucose depletion stress requires Hbs1 GTPase activity but not Dom34-Hbs1 interaction or the Hbs1 N-terminus.**

Quantification of 80S over polysome ratios corresponding to Figure 4A (A) and 4B (B).
