# Supplementary material
Source: PubMed Central journal article supplement (PMC3989619)
Supplement: embj0033-0265-sd5.pdf [file embj0033-0265-sd5.pdf]

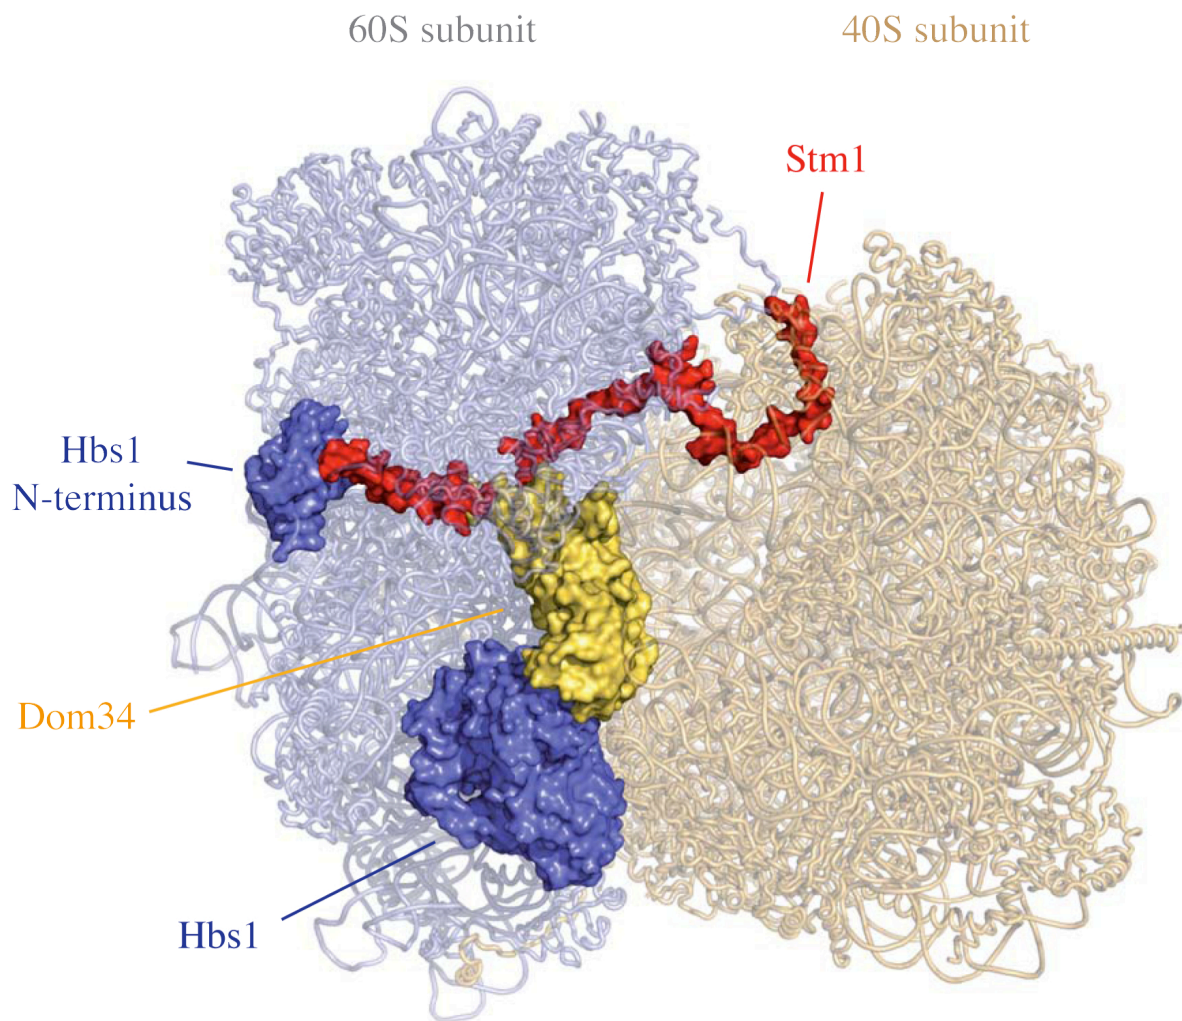

**Supplementary Figure 4. Localization of the Dom34-Hbs1 complex and Stm1 in a model of the 80S ribosome.**

Alignment of a high resolution structure of an 80S ribosome from glucose depleted yeast containing Stm1 (PDB 3u5b, 3u5c, 3u5d and 3u5e) (Ben-Shem et al, 2011) and a cryo-EM structure of the Dom34-Hbs1 complex bound to an 80S ribosome (PDB 3IZQ) (Becker et al, 2011).
