# Supplementary material
Source: PubMed Central journal article supplement (PMC3989619)
Supplement: embj0033-0265-sd6.pdf [file embj0033-0265-sd6.pdf]

## Supplementary References

- Baudin-Baillieu A, Guillemet E, Cullin C, Lacroute F (1997) Construction of a yeast strain deleted for the TRP1 promoter and coding region that enhances the efficiency of the polymerase chain reaction-disruption method. *Yeast* **13**: 353-356
- Becker T, Armache JP, Jarasch A, Anger AM, Villa E, Sieber H, Motaal BA, Mielke T, Berninghausen O, Beckmann R (2011) Structure of the no-go mRNA decay complex Dom34-Hbs1 bound to a stalled 80S ribosome. *Nat Struct Mol Biol* **18**: 715-720
- Ben-Shem A, Garreau de Loubresse N, Melnikov S, Jenner L, Yusupova G, Yusupov M (2011) The structure of the eukaryotic ribosome at 3.0 Å resolution. *Science* **334**: 1524-1529
- Gallie DR, Feder JN, Schimke RT, Walbot V (1991) Post-transcriptional regulation in higher eukaryotes: the role of the reporter gene in controlling expression. *Mol Gen Genet* **228**: 258-264
- Shoemaker CJ, Eyler DE, Green R (2010) Dom34:Hbs1 promotes subunit dissociation and peptidyl-tRNA drop-off to initiate no-go decay. *Science* **330**: 369-372
- Shoemaker CJ, Green R (2011) Kinetic analysis reveals the ordered coupling of translation termination and ribosome recycling in yeast. *Proc Natl Acad Sci U S A* **108**: E1392-1398
- Tarun SZ, Jr., Sachs AB (1995) A common function for mRNA 5' and 3' ends in translation initiation in yeast. *Genes Dev* **9**: 2997-3007
- Tuite MF, Plesset J (1986) mRNA-dependent yeast cell-free translation systems: theory and practice. *Yeast* **2**: 35-52
- van den Elzen AM, Henri J, Lazar N, Gas ME, Durand D, Lacroute F, Nicaise M, van Tilbeurgh H, Seraphin B, Graille M (2010) Dissection of Dom34-Hbs1 reveals independent functions in two RNA quality control pathways. *Nat Struct Mol Biol* **17**: 1446-1452
